# Supplementary material for: Impact of Pre-Analytical Factors on MSI Test Accuracy in Mucinous Colorectal Adenocarcinoma: A Multi-Assay Concordance Study
Source: PubMed Central journal article supplement (PMC7565496; doi:10.3390/cells9092019), 2020-09-02
Supplement: cells-09-02019-s001.pdf [file cells-09-02019-s001.pdf]

**Supplementary Table S1.** Patients' characteristics. For each patient, the site of the primary tumor (right colon, transvers, left colon, rectosigmoid), the pathological classification according to the Union for International Cancer Control (UICC) 2017 (pT, pN, pM), the presence of vascular hematic invasion (V), vascular lymphatic invasion (L), and perineural invasion (Pn), were reported.

| Patient | Site         | pTNM             | V, L, Pn  |
|---------|--------------|------------------|-----------|
| 1       | transvers    | pT2 pN0          | V0 L0 Pn0 |
| 2       | right colon  | pT3 pN0          | V1 L1 Pn0 |
| 3       | left colon   | pT4a pN2a        | V0 L1 Pn0 |
| 4       | right colon  | pT4a pN0         | V1 L1 Pn0 |
| 5       | left colon   | pT3 pN0          | V0 L1 Pn0 |
| 6       | left colon   | pT4a pN0         | V0 L0 Pn0 |
| 7       | right colon  | pT3 pN0          | V0 L0 Pn0 |
| 8       | right colon  | pT3 pN0          | V0 L0 Pn0 |
| 9       | right colon  | pT4 pN0          | V0 L0 Pn0 |
| 10      | right colon  | pT3 pN0          | V0 L0 Pn0 |
| 11      | right colon  | pT4a pN1b        | V0 L1 Pn0 |
| 12      | right colon  | pT4a pN2b        | V1 L1 Pn1 |
| 13      | left colon   | pT3 pN0          | V0 L0 Pn0 |
| 14      | left colon   | pT3 pN2a         | V0 L1 Pn0 |
| 15      | left colon   | pT3 pN1b         | V0 L1 Pn0 |
| 16      | right colon  | pT4b pN1c pM1    | V0 L1 Pn0 |
| 17      | left colon   | pT4a pN1         | V0 L1 Pn0 |
| 18      | transvers    | pT3 pN1b         | V0 L1 Pn0 |
| 19      | left colon   | pT3 pN0          | V0 L1 Pn0 |
| 20      | right colon  | pT4a pN1a pM1c   | V0 L1 Pn0 |
| 21      | right colon  | pT3 pN0          | V0 L0 Pn0 |
| 22      | right colon  | pT4 pN0          | V0 L0 Pn0 |
| 23      | rectosigmoid | pT2 pN1a         | V1 L1 Pn1 |
| 24      | rectosigmoid | pT4a pN1b        | V1 L1 Pn0 |
| 25      | right colon  | pT4a pN0         | V0 L0 Pn0 |
| 26      | right colon  | pT2 pN1a         | V0 L1Pn0  |
| 27      | right colon  | pT3 pN0          | V0 L0 Pn0 |
| 28      | right colon  | pT4a pN2a        | V0 L1Pn0  |
| 29      | transvers    | pT4a(m-2)pN1aM1c | V0 L1 Pn1 |
| 30      | rectosigmoid | pT3 pN2a         | V1 L1 Pn1 |
| 31      | right colon  | pT4a pN1c        | V0 L0 Pn0 |
| 32      | rectosigmoid | pT3 pN0          | V0 L0 Pn0 |
| 33      | right colon  | pT4a pN2a pM1a   | V1 L1 Pn1 |
| 34      | rectosigmoid | pT4a pN2b        | V1 L1 Pn1 |
| 35      | right colon  | pT4a pN0         | V0 L0 Pn0 |
| 36      | left colon   | pT3 pN1a         | V0 L1 Pn0 |
| 37      | right colon  | pT2 pN0          | V0 L0 Pn0 |
| 38      | right colon  | pT4a pN2a        | V1 L1 Pn0 |
| 39      | left colon   | pT3a pN2a        | V1 L1 Pn1 |
| 40      | left colon   | pT3 pN2b         | V1 L1 Pn0 |
| 41      | right colon  | pT4a pN2a pM1b   | V0 L1 Pn0 |
| 42      | right colon  | pT3 pN0          | V0 L0 Pn0 |
| 43      | right colon  | pT4a pN2b        | V1 L1 Pn0 |
| 44      | right colon  | pT4a pN2b        | V1 L1 Pn0 |
| 45      | right colon  | pT3 pN0          | V0 L0 PN0 |
| 46      | right colon  | pT4a pN0         | V0 L0 PN0 |
| 47      | right colon  | pT3 pN2b         | V0 L1 Pn0 |
| 48      | right colon  | pT1 N0           | V0 L0 Pn0 |
| 49      | right colon  | pT3 N0           | V0 L0 Pn0 |

|    |              |                     |           |
|----|--------------|---------------------|-----------|
| 50 | left colon   | pT3 pN1b            | V0 L1 Pn0 |
| 51 | rectosigmoid | pT3 pN1             | V0 L1 Pn0 |
| 52 | right colon  | pT3 pN1             | V0 L1 Pn0 |
| 53 | right colon  | pT4a pN1a           | V1 L1 Pn1 |
| 54 | right colon  | pT3 pN2b            | V1 L1 Pn0 |
| 55 | rectosigmoid | pT3 pN0             | V0 L0 Pn0 |
| 56 | rectosigmoid | pT4b pN0            | V0 L1 Pn0 |
| 57 | left colon   | pT3 pN2a pM1a (m-l) | V1L1Pn0   |
| 58 | right colon  | pT3 pN2a pM1a       | V1L1Pn0   |
| 59 | right colon  | pT3 pN1a            | V1 L0 Pn0 |
| 60 | right colon  | pT3 pN1b            | V0 L1 Pn0 |
| 61 | right colon  | pT3 pN1b pM1a l     | V1 L1 pN0 |
| 62 | left colon   | pT3 pN2a            | V0 L1 Pn0 |
| 63 | right colon  | pT3 pN1             | V0 L1 Pn0 |
| 64 | right colon  | pT3 pN0             | V0 L0 Pn0 |
| 65 | right colon  | pT3 pN0             | V0 L0 Pn0 |
| 66 | right colon  | pT2 pN0             | V0 L0 Pn0 |
| 67 | rectosigmoid | pT3 pN0             | V0 L0 Pn0 |
| 68 | right colon  | pT3 pN0             | V0 L0 Pn0 |
| 69 | right colon  | pT3 pN1a            | V1 L0 Pn0 |
| 70 | right colon  | pT3 pN0             | V0 L0 Pn0 |
| 71 | right colon  | pT3 pN1a            | V1 L1 Pn0 |
| 72 | right colon  | pT2 (m-2)pN0        | V0 L0 Pn0 |
| 73 | right colon  | pT3 pN1a            | V0 L1 Pn0 |
| 74 | right colon  | pT4b pN1c pM1c      | V1 L1 Pn0 |
| 75 | right colon  | pT3 pN1a            | V0 L1 Pn0 |

**Supplementary Table S2.** Patients characteristics. For each patient, neoplastic cellular percentage, the presence of necrosis, desmoplasia, inflammation and mucinous acellular component, were reported.

| Patient | % neoplastic cells | Necrosis | Desmoplasia | Inflammation | Mucin |
|---------|--------------------|----------|-------------|--------------|-------|
| 1       | 95%                | 0%       | 0%          | 0%           | >50%  |
| 2       | 70%                | 0%       | <50%        | <50%         | <50%  |
| 3       | 70%                | <50%     | <50%        | 0%           | >50%  |
| 4       | 60%                | <50%     | <50%        | 0%           | >50%  |
| 5       | 50%                | <50%     | >50%        | <50%         | <50%  |
| 6       | 15%                | <50%     | <50%        | >50%         | >50%  |
| 7       | 60%                | 0%       | <50%        | <50%         | <50%  |
| 8       | 60%                | 0%       | <50%        | <50%         | >50%  |
| 9       | 60%                | <50%     | <50%        | <50%         | >50%  |
| 10      | 70%                | <50%     | <50%        | <50%         | <50%  |
| 11      | 50%                | 0%       | 0%          | <50%         | >50%  |
| 12      | 70%                | 0%       | 0%          | 0%           | >50%  |
| 13      | 70%                | <50%     | <50%        | <50%         | <50%  |
| 14      | 50%                | 0%       | <50%        | <50%         | >50%  |
| 15      | 70%                | <50%     | <50%        | <50%         | >50%  |
| 16      | 80%                | <50%     | <50%        | <50%         | >50%  |
| 17      | 50%                | >50%     | <50%        | <50%         | >50%  |
| 18      | 25%                | <50%     | >50%        | <50%         | >50%  |
| 19      | 75%                | 0%       | 0%          | 0%           | <50%  |
| 20      | 50%                | <50%     | <50%        | <50%         | >50%  |
| 21      | 90%                | 0%       | <50%        | <50%         | <50%  |
| 22      | 40%                | 0%       | <50%        | <50%         | >50%  |
| 23      | 60%                | 0%       | 0%          | 0%           | <50%  |
| 24      | 70%                | 0%       | <50%        | 0%           | <50%  |
| 25      | 30%                | 0%       | >50%        | <50%         | >50%  |
| 26      | 90%                | 0%       | <50%        | 0%           | >50%  |
| 27      | 40%                | 0%       | >50%        | <50%         | <50%  |
| 28      | 85%                | 0%       | <50%        | <50%         | >50%  |
| 29      | 50%                | <50%     | >50%        | <50%         | 0%    |
| 30      | 90%                | <10%     | <10%        | 0%           | >50%  |
| 31      | 90%                | 0%       | <50%        | 0%           | >50%  |
| 32      | 10%                | 0%       | >50%        | <50%         | >50%  |
| 33      | 60%                | <50%     | <50%        | <50%         | >50%  |
| 34      | 60%                | 0%       | <50%        | 0%           | >50%  |
| 35      | 30%                | 0%       | <50%        | <50%         | >50%  |
| 36      | 30%                | 0%       | <50%        | <50%         | 50%   |
| 37      | 85%                | <50%     | <50%        | <50%         | <50%  |
| 38      | 70%                | 0%       | >50%        | <50%         | <50%  |
| 39      | 80%                | <50%     | <50%        | <50%         | <50%  |
| 40      | 65%                | 0%       | <50%        | <50%         | <50%  |
| 41      | 35%                | 0%       | <50%        | <50%         | >50%  |
| 42      | 60%                | 0%       | <50%        | <50%         | <50%  |
| 43      | 40%                | 0%       | <50%        | 0            | >50%  |
| 44      | 80%                | >50%     | <50%        | 0            | <50%  |
| 45      | 80%                | <50%     | <50%        | 0            | <50%  |
| 46      | 70%                | 0%       | <50%        | 0            | >50%  |
| 47      | 60%                | 0%       | <50%        | 0            | >50%  |
| 48      | 70%                | 0%       | <50%        | 0            | <50%  |
| 49      | 80%                | 0%       | <50%        | <50%         | >50%  |
| 50      | 40%                | 0%       | <50%        | <50%         | <50%  |
| 51      | 80%                | 0%       | <50%        | 0            | <50%  |
| 52      | 90%                | <50%     | <50%        | <50%         | <50%  |
| 53      | 90%                | <50%     | <50%        | 0            | <50%  |
| 54      | 80%                | 0%       | <50%        | 0            | <50%  |

---

|    |     |      |      |      |      |
|----|-----|------|------|------|------|
| 55 | 70% | 0%   | <50% | 0    | <50% |
| 56 | 20% | 0%   | <50% | 0    | >50% |
| 57 | 50% | 0%   | <50% | <50% | >50% |
| 58 | 75% | 0%   | <50% | 0%   | >50% |
| 59 | 40% | <50% | <50% | <50% | <50% |
| 60 | 40% | 0%   | <50% | 0%   | >50% |
| 61 | 70% | <50% | <50% | <50% | <50% |
| 62 | 75% | 0%   | <50% | <50% | >50% |
| 63 | 80% | <50% | 0%   | <50% | <50% |
| 64 | 65% | 0%   | 0%   | <50% | <50% |
| 65 | 60% | <50% | <50% | <50% | <50% |
| 66 | 40% | <50% | <50% | <50% | >50% |
| 67 | 65% | 0%   | <50% | <50% | >50% |
| 68 | 70% | <50% | <50% | <50% | >50% |
| 69 | 75% | 0%   | <50% | <50% | <50% |
| 70 | 70% | 0%   | 0%   | <50% | >50% |
| 71 | 85% | 0%   | 0%   | 0%   | <50% |
| 72 | 75% | <50% | 0%   | <50% | >50% |
| 73 | 50% | <50% | 0%   | <50% | >50% |
| 74 | 80% | <50% | 0%   | <50% | <50% |
| 75 | 50% | >50% | <50% | >50% | >50% |

---

**Supplementary Table S3.** Summary of molecular analysis of MMR/MSS status for 73 mucinous-CRC patients.

| ID | % Neoplastic cells | DNA amount (ng/ $\mu$ L) | DIN | IHC  | Idylla™ | TapeStation 4200 |
|----|--------------------|--------------------------|-----|------|---------|------------------|
| 1  | 95%                | 9.7                      | 4.0 | dMMR | MSI-H   | MSI-H            |
| 2  | 70%                | 10.2                     | 2.6 | dMMR | MSI-H   | MSI-H            |
| 3  | 70%                | 14.2                     | 2.9 | pMMR | MSS     | MSS              |
| 4  | 60%                | 8.6                      | 2.6 | dMMR | MSI-H   | MSI-H            |
| 5  | 50%                | 12.3                     | 4.7 | pMMR | MSS     | MSS              |
| 6  | 15%                | 0.7                      | NA  | pMMR | MSS     | MSS              |
| 7  | 60%                | 3.2                      | 3.5 | pMMR | MSS     | MSS              |
| 8  | 60%                | 3.2                      | 4.4 | dMMR | MSI-H   | MSI-H            |
| 9  | 60%                | 5.2                      | 4.1 | dMMR | MSI-H   | MSI-H            |
| 10 | 70%                | 5.3                      | 3.0 | dMMR | MSI-H   | MSS*             |
| 11 | 50%                | 10.0                     | 3.5 | pMMR | MSS     | MSS              |
| 12 | 70%                | 5.1                      | 5.4 | dMMR | MSI-H   | MSI-H            |
| 13 | 70%                | 4.7                      | 2.9 | dMMR | MSI-H   | MSI-H            |
| 14 | 50%                | 3.7                      | 4.6 | dMMR | MSI-H   | MSI-H            |
| 15 | 70%                | 3.8                      | 4.1 | dMMR | MSI-H   | MSI-H            |
| 16 | 80%                | 32.9                     | 5.6 | pMMR | MSI-H   | MSI-H            |
| 17 | 50%                | 25.7                     | 3.4 | pMMR | MSS     | MSS              |
| 18 | 25%                | 3.0                      | 5.7 | pMMR | MSS     | MSS              |
| 19 | 75%                | 20.2                     | 4.9 | pMMR | MSS     | MSS*             |
| 20 | 50%                | 10.5                     | 4.4 | pMMR | MSS     | MSS*             |
| 21 | 90%                | 13.2                     | 6.1 | dMMR | MSI-H   | MSI-H            |
| 22 | 40%                | 15.6                     | 4.8 | pMMR | MSS     | MSS              |
| 23 | 60%                | 5.5                      | 4.9 | pMMR | MSS     | MSS              |
| 24 | 70%                | 17.1                     | 3.5 | pMMR | MSS     | MSI-H            |
| 25 | 30%                | 29.7                     | 6.3 | pMMR | MSS     | MSS              |
| 26 | 90%                | 20.5                     | 4.4 | pMMR | MSS     | MSS*             |
| 27 | 40%                | 47.1                     | 5.6 | pMMR | MSS     | MSS              |
| 28 | 85%                | 18.6                     | 5.5 | pMMR | MSS     | MSS              |
| 29 | 50%                | 16.3                     | 4.2 | pMMR | MSS     | MSS              |
| 30 | 90%                | 18.2                     | 4.5 | pMMR | MSS     | MSS              |
| 31 | 90%                | 4.9                      | 4.5 | pMMR | MSS     | MSS              |
| 32 | 10%                | 9.1                      | 3.0 | pMMR | MSS     | MSS              |
| 33 | 60%                | 14.2                     | 4.5 | pMMR | MSS     | MSS              |
| 34 | 60%                | 13.1                     | 4.1 | pMMR | MSS     | MSS              |
| 35 | 85%                | 67.5                     | 5.0 | pMMR | MSS     | MSS              |
| 36 | 70%                | 28.1                     | 4.3 | pMMR | MSS     | MSS              |
| 37 | 80%                | 69.4                     | 4.9 | pMMR | MSS     | MSS*             |
| 38 | 65%                | 6.0                      | 2.8 | pMMR | MSS     | MSS              |
| 39 | 35%                | 23.6                     | 3.2 | pMMR | MSS     | MSS              |
| 40 | 60%                | 13.5                     | 2.1 | pMMR | MSS     | MSS              |
| 41 | 40%                | 14.9                     | 3.3 | pMMR | MSS     | MSS              |
| 42 | 80%                | 20.3                     | 2.6 | dMMR | MSI-H   | MSS              |
| 43 | 80%                | 13.3                     | 2.4 | pMMR | MSS     | MSS              |
| 44 | 70%                | 36.2                     | 3.3 | pMMR | MSS     | MSS              |
| 45 | 60%                | 34.4                     | 3.5 | pMMR | MSS     | MSS              |
| 46 | 70%                | 24.3                     | 2.5 | pMMR | MSS     | MSS              |
| 47 | 80%                | 38.4                     | 2.8 | dMMR | MSI-H   | MSS              |
| 48 | 40%                | 65.7                     | 4.3 | pMMR | MSS     | MSS              |
| 49 | 80%                | 4.2                      | 1.6 | pMMR | MSS     | MSS              |
| 50 | 90%                | 11.8                     | 2.1 | pMMR | MSS     | MSS              |
| 51 | 90%                | 62.2                     | 4.8 | dMMR | MSI-H   | MSS              |
| 52 | 80%                | 62.0                     | 3.8 | pMMR | MSS     | MSS              |
| 53 | 70%                | 42.8                     | 3.4 | pMMR | MSS     | MSS              |
| 54 | 20%                | 18.9                     | 3.5 | dMMR | MSS     | MSS              |
| 55 | 50%                | 3.4                      | 2.1 | pMMR | MSS     | MSS              |

|    |     |      |     |      |       |      |
|----|-----|------|-----|------|-------|------|
| 56 | 75% | 11.8 | 4.3 | pMMR | MSS   | MSS  |
| 57 | 40% | 12.8 | 3.4 | dMMR | MSS   | MSS  |
| 58 | 40% | 2.6  | 3.2 | dMMR | MSS   | MSS  |
| 59 | 70% | 10.2 | 1.3 | dMMR | MSS   | MSS* |
| 60 | 75% | 5.7  | 2.2 | pMMR | MSS   | MSS  |
| 61 | 80% | 8.6  | 2.0 | pMMR | MSS   | MSS  |
| 62 | 65% | 6.4  | 2.3 | pMMR | MSS   | MSS  |
| 63 | 60% | 9.5  | 1.8 | pMMR | MSS   | MSS  |
| 64 | 40% | 6.6  | 2.7 | pMMR | MSS   | MSS  |
| 65 | 65% | 18.5 | 2.0 | pMMR | MSS   | MSS  |
| 66 | 70% | 52.7 | 2.3 | pMMR | MSS   | MSS  |
| 67 | 75% | 66.5 | 2.0 | dMMR | MSI-H | MSS* |
| 68 | 70% | 54.5 | 2.4 | pMMR | MSS   | MSS  |
| 69 | 85% | 16.5 | 2.2 | pMMR | MSS   | MSS  |
| 70 | 75% | 24.3 | 2.3 | dMMR | MSI-H | MSS* |
| 71 | 50% | 73.5 | 2.2 | pMMR | MSS   | MSS  |
| 72 | 80% | 24.3 | 1.7 | dMMR | MSI-H | MSS  |
| 73 | 50% | 2.69 | NE  | dMMR | MSI-H | MSS* |

Note: \*MSI-L. Abbreviations: CRC: colo-rectal cancer; DIN: DNA integrity number; dMMR: deficient mismatch repair; ID: identification number; IHC: immunohistochemistry; MSI-H: high microsatellite instability; MSI-L: low microsatellite instability MSS: microsatellite stable; NA: not assessed; pMMR: proficient mismatch repair.

**Supplementary Table S4.** Data obtained by comparing results between IHC and TapeStation 4200, IHC and Idylla™, and Idylla™ and TapeStation 4200, taking into account the percentage of acellular mucin.

| <b>≤50 acellular mucin IHC vs. TapeStation</b>                                          |                |             |              |
|-----------------------------------------------------------------------------------------|----------------|-------------|--------------|
| <b>TapeStation 4200</b>                                                                 | <b>IHC</b>     |             | <b>Total</b> |
|                                                                                         | <b>dMMR</b>    | <b>pMMR</b> |              |
| <b>MSI-H</b>                                                                            | 3 (9.1)        | 1 (3)       | 4 (12.1)     |
| <b>MSS</b>                                                                              | 7 (21.2)       | 22 (66.7)   | 29 (87.9)    |
| <b>Total</b>                                                                            | 10 (30.3)      | 23 (69.7)   | 33 (100.0)   |
| kappa=0.31; 95% C.I.: -0.03 to 0.64                                                     |                |             |              |
| <b>&gt;50 acellular mucin IHC vs. TapeStation</b>                                       |                |             |              |
| <b>TapeStation 4200</b>                                                                 | <b>IHC</b>     |             | <b>Total</b> |
|                                                                                         | <b>dMMR</b>    | <b>pMMR</b> |              |
| <b>MSI-H</b>                                                                            | 7 (17.5)       | 1 (2.5)     | 8 (20.0)     |
| <b>MSS</b>                                                                              | 5 (12.5)       | 27 (67.5)   | 32 (80.0)    |
| <b>Total</b>                                                                            | 12 (30.0)      | 28 (70.0)   | 40 (100.0)   |
| kappa=0.61; 95% C.I.: 0.33 to 0.88; <i>p</i> -value for difference between kappa: 0.182 |                |             |              |
| <b>≤50 acellular mucin IHC vs. Idylla™</b>                                              |                |             |              |
| <b>Idylla™</b>                                                                          | <b>IHC</b>     |             | <b>Total</b> |
|                                                                                         | <b>dMMR</b>    | <b>pMMR</b> |              |
| <b>MSI-H</b>                                                                            | 8 (24.2)       | 0 (0.0)     | 8 (24.2)     |
| <b>MSS</b>                                                                              | 2 (6.1)        | 23 (69.7)   | 25 (75.8)    |
| <b>Total</b>                                                                            | 10 (30.3)      | 23 (69.7)   | 33 (100.0)   |
| kappa=0.85; 95% C.I.: 0.65 to 1                                                         |                |             |              |
| <b>&gt;50 acellular mucin IHC vs. Idylla™</b>                                           |                |             |              |
| <b>Idylla™</b>                                                                          | <b>IHC</b>     |             | <b>Total</b> |
|                                                                                         | <b>dMMR</b>    | <b>pMMR</b> |              |
| <b>MSI-H</b>                                                                            | 10 (25.0)      | 1 (2.5)     | 11 (27.5)    |
| <b>MSS</b>                                                                              | 2 (5.0)        | 27 (67.5)   | 29 (72.5)    |
| <b>Total</b>                                                                            | 12 (30.0)      | 28 (70.0)   | 40 (100.0)   |
| kappa=0.82; 95% C.I.: 0.62 to 1; <i>p</i> -value for difference between kappa: 0.836    |                |             |              |
| <b>≤50 acellular mucin Idylla™ vs. TapeStation 4200</b>                                 |                |             |              |
| <b>TapeStation 4200</b>                                                                 | <b>Idylla™</b> |             | <b>Total</b> |
|                                                                                         | <b>MSI-H</b>   | <b>MSS</b>  |              |
| <b>MSI-H</b>                                                                            | 3 (9.1)        | 1 (3.0)     | 4 (12.1)     |
| <b>MSS</b>                                                                              | 5 (15.2)       | 24 (72.7)   | 29 (87.9)    |
| <b>Total</b>                                                                            | 8 (24.2)       | 25 (75.8)   | 33 (100.0)   |
| kappa=0.4; 95% C.I.: 0.03 to 0.78                                                       |                |             |              |
| <b>&gt;50 acellular mucin Idylla™ vs. TapeStation 4200</b>                              |                |             |              |
| <b>TapeStation 4200</b>                                                                 | <b>Idylla™</b> |             | <b>Total</b> |
|                                                                                         | <b>MSI-H</b>   | <b>MSS</b>  |              |
| <b>MSI-H</b>                                                                            | 8 (20.0)       | 0 (0.0)     | 8 (20.0)     |
| <b>MSS</b>                                                                              | 3 (7.5)        | 29 (72.5)   | 32 (80.0)    |
| <b>Total</b>                                                                            | 11 (27.5)      | 29 (72.5)   | 40 (100.0)   |
| kappa=0.79; 95% C.I.: 0.58 to 1; <i>p</i> -value for difference between kappa: 0.072    |                |             |              |

Abbreviations: dMMR: deficient mismatch repair; IHC: immunohistochemistry; MSI-H: high microsatellite instability; pMMR: proficient mismatch repair.

**Supplementary Table S5.** Data obtained by comparing results between IHC and TapeStation 4200, IHC and Idylla™, and Idylla™ and TapeStation 4200, taking into account the stratification by years.

| <b>2007-2017 IHC vs. TapeStation 4200</b>                                            |                |             |              |
|--------------------------------------------------------------------------------------|----------------|-------------|--------------|
| <b>TapeStation 4200</b>                                                              | <b>IHC</b>     |             | <b>Total</b> |
|                                                                                      | <b>dMMR</b>    | <b>pMMR</b> |              |
| <b>MSI-H</b>                                                                         | 4 (7.5)        | 0 (0.0)     | 4 (7.5)      |
| <b>MSS</b>                                                                           | 11 (20.8)      | 38 (71.7)   | 49 (92.5)    |
| <b>Total</b>                                                                         | 15 (28.3)      | 38 (71.7)   | 53 (100.0)   |
| kappa=0.34; 95% C.I.: 0.08 to 0.6                                                    |                |             |              |
| <b>2018-2019 IHC vs. TapeStation 4200</b>                                            |                |             |              |
| <b>TapeStation 4200</b>                                                              | <b>IHC</b>     |             | <b>Total</b> |
|                                                                                      | <b>dMMR</b>    | <b>pMMR</b> |              |
| <b>MSI-H</b>                                                                         | 6 (30.0)       | 2 (10.0)    | 8 (40.0)     |
| <b>MSS</b>                                                                           | 1 (5.0)        | 11 (55.0)   | 12 (60.0)    |
| <b>Total</b>                                                                         | 7 (35.0)       | 13 (65.0)   | 20 (100.0)   |
| kappa=0.68; 95% C.I.: 0.35 to 1; <i>p</i> -value for difference between kappa: 0.136 |                |             |              |
| <b>2007-2017 IHC vs. Idylla™</b>                                                     |                |             |              |
| <b>Idylla™</b>                                                                       | <b>IHC</b>     |             | <b>Total</b> |
|                                                                                      | <b>dMMR</b>    | <b>pMMR</b> |              |
| <b>MSI-H</b>                                                                         | 11 (20.8)      | 0 (0.0)     | 11 (20.8)    |
| <b>MSS</b>                                                                           | 4 (7.5)        | 38 (71.7)   | 42 (79.2)    |
| <b>Total</b>                                                                         | 15 (28.3)      | 38 (71.7)   | 53 (100.0)   |
| kappa=0.8; 95% C.I.: 0.61 to 0.98                                                    |                |             |              |
| <b>2018-2019 IHC vs. Idylla™</b>                                                     |                |             |              |
| <b>Idylla™</b>                                                                       | <b>IHC</b>     |             | <b>Total</b> |
|                                                                                      | <b>dMMR</b>    | <b>pMMR</b> |              |
| <b>MSI-H</b>                                                                         | 7 (35.0)       | 1 (5.0)     | 8 (40.0)     |
| <b>MSS</b>                                                                           | 0 (0.0)        | 12 (60.0)   | 12 (60.0)    |
| <b>Total</b>                                                                         | 7 (35.0)       | 13 (65.0)   | 20 (100.0)   |
| kappa=0.89; 95% C.I.: 0.69 to 1; <i>p</i> -value for difference between kappa: 0.537 |                |             |              |
| <b>2007-2017 Idylla™ vs. TapeStation 4200</b>                                        |                |             |              |
| <b>TapeStation 4200</b>                                                              | <b>Idylla™</b> |             | <b>Total</b> |
|                                                                                      | <b>MSI-H</b>   | <b>MSS</b>  |              |
| <b>MSI-H</b>                                                                         | 4 (7.5)        | 0 (0.0)     | 4 (7.5)      |
| <b>MSS</b>                                                                           | 7 (13.2)       | 42 (79.2)   | 49 (92.5)    |
| <b>Total</b>                                                                         | 11 (20.8)      | 42 (79.2)   | 53 (100.0)   |
| kappa=0.48; 95% C.I.: 0.17 to 0.78                                                   |                |             |              |
| <b>2018-2019 Idylla™ vs. TapeStation 4200</b>                                        |                |             |              |
| <b>TapeStation 4200</b>                                                              | <b>Idylla™</b> |             | <b>Total</b> |
|                                                                                      | <b>MSI-H</b>   | <b>MSS</b>  |              |
| <b>MSI-H</b>                                                                         | 7 (35.0)       | 1 (5.0)     | 8 (40.0)     |
| <b>MSS</b>                                                                           | 1 (5.0)        | 11 (55.0)   | 12 (60.0)    |
| <b>Total</b>                                                                         | 8 (40.0)       | 12 (60.0)   | 20 (100.0)   |
| kappa=0.79; 95% C.I.: 0.52 to 1; <i>p</i> -value for difference between kappa: 0.161 |                |             |              |

Abbreviations: dMMR: deficient mismatch repair; IHC: immunohistochemistry; MSI-H: high microsatellite instability; pMMR: proficient mismatch repair.



**Supplementary Table S6.** Data obtained by comparing results between IHC and TapeStation 4200, IHC and Idylla™, and Idylla™ and TapeStation 4200, taking into account DNA concentration.

| <b>&lt;25 ng/μl IHC vs. TapeStation 4200</b>                                              |                |             |              |
|-------------------------------------------------------------------------------------------|----------------|-------------|--------------|
| <b>TapeStation 4200</b>                                                                   | <b>IHC</b>     |             | <b>Total</b> |
|                                                                                           | <b>dMMR</b>    | <b>pMMR</b> |              |
| <b>MSI-H</b>                                                                              | 10 (18.2)      | 1 (1.8)     | 11 (20.0)    |
| <b>MSS</b>                                                                                | 9 (16.4)       | 35 (63.6)   | 44 (80.0)    |
| <b>Total</b>                                                                              | 19 (34.5)      | 36 (65.5)   | 55 (100.0)   |
| kappa=0.55; 95% C.I.: 0.32 to 0.79                                                        |                |             |              |
| <b>≥25 ng/μL IHC vs. TapeStation 4200</b>                                                 |                |             |              |
| <b>TapeStation 4200</b>                                                                   | <b>IHC</b>     |             | <b>Total</b> |
|                                                                                           | <b>dMMR</b>    | <b>pMMR</b> |              |
| <b>MSI-H</b>                                                                              | 0 (0.0)        | 1 (5.6)     | 1 (5.6)      |
| <b>MSS</b>                                                                                | 3 (16.7)       | 14 (77.8)   | 17 (94.4)    |
| <b>Total</b>                                                                              | 3 (16.7)       | 15 (83.3)   | 18 (100.0)   |
| kappa=-0.09; 95% C.I.: -0.23 to 0.05; <i>p</i> -value for difference between kappa: 0.054 |                |             |              |
| <b>&lt;25 ng/μL IHC vs. Idylla™</b>                                                       |                |             |              |
| <b>Idylla™</b>                                                                            | <b>IHC</b>     |             | <b>Total</b> |
|                                                                                           | <b>dMMR</b>    | <b>pMMR</b> |              |
| <b>MSI-H</b>                                                                              | 15 (27.3)      | 0 (0.0)     | 15 (27.3)    |
| <b>MSS</b>                                                                                | 4 (7.3)        | 36 (65.5)   | 40 (72.7)    |
| <b>Total</b>                                                                              | 19 (34.5)      | 36 (65.5)   | 55 (100.0)   |
| kappa=0.83; 95% C.I.: 0.67 to 0.99                                                        |                |             |              |
| <b>≥25 ng/μL IHC vs. Idylla™</b>                                                          |                |             |              |
| <b>Idylla™</b>                                                                            | <b>IHC</b>     |             | <b>Total</b> |
|                                                                                           | <b>dMMR</b>    | <b>pMMR</b> |              |
| <b>MSI-H</b>                                                                              | 3 (16.7)       | 1 (5.6)     | 4 (22.2)     |
| <b>MSS</b>                                                                                | 0 (0.0)        | 14 (77.8)   | 14 (77.8)    |
| <b>Total</b>                                                                              | 3 (16.7)       | 15 (83.3)   | 18 (100.0)   |
| kappa=0.82; 95% C.I.: 0.49 to 1; <i>p</i> -value for difference between kappa: 0.969      |                |             |              |
| <b>&lt;25 ng/μL Idylla™ vs. TapeStation 4200</b>                                          |                |             |              |
| <b>TapeStation 4200</b>                                                                   | <b>Idylla™</b> |             | <b>Total</b> |
|                                                                                           | <b>MSI-H</b>   | <b>MSS</b>  |              |
| <b>MSI-H</b>                                                                              | 10 (18.2)      | 1 (1.8)     | 11 (20.0)    |
| <b>MSS</b>                                                                                | 5 (9.1)        | 39 (70.9)   | 44 (80.0)    |
| <b>Total</b>                                                                              | 15 (27.3)      | 40 (72.7)   | 55 (100.0)   |
| kappa=0.7; 95% C.I.: 0.48 to 0.92                                                         |                |             |              |
| <b>≥25 ng/μL Idylla™ vs. TapeStation 4200</b>                                             |                |             |              |
| <b>TapeStation 4200</b>                                                                   | <b>Idylla™</b> |             | <b>Total</b> |
|                                                                                           | <b>MSI-H</b>   | <b>MSS</b>  |              |
| <b>MSI-H</b>                                                                              | 1 (5.6)        | 0 (0.0)     | 1 (5.6)      |
| <b>MSS</b>                                                                                | 3 (16.7)       | 14 (77.8)   | 17 (94.4)    |
| <b>Total</b>                                                                              | 4 (22.2)       | 14 (77.8)   | 18 (100.0)   |
| kappa=0.34; 95% C.I.: -0.17 to 0.85; <i>p</i> -value for difference between kappa: 0.172  |                |             |              |

Abbreviations: dMMR: deficient mismatch repair; IHC: immunohistochemistry; MSI-H: high microsatellite instability; pMMR: proficient mismatch repair.
